# Supplementary material for: Global Burden Shift from Infectious to Non-Communicable Neurological Disorders in Adolescents and Young Adults (10–24 Years): Findings from the Global Burden of Disease Study 1990–2021
Source: Research Square preprint supplement (doi:10.21203/rs.3.rs-7995608/v1), 2025-11-18
Supplement: Supplementary file 1 [file 3a58505e664262a30e28bee8.docx]

**Supplemental Table 1.** Disorders affecting the central and peripheral nervous systems

| No | Category Name in GBD | Cause Name in GBD |
| --- | --- | --- |
| 1 | Sexually transmitted infections excluding HIV | Syphilis |
| 2 | Neglected tropical diseases and malaria | Malaria |
| 3 |  | Cysticercosis |
| 4 |  | Rabies |
| 5 |  | Zika virus |
| 6 | Other infectious diseases | Meningitis |
| 7 |  | Encephalitis |
| 8 |  | Tetanus |
| 9 | Neonatal Disorder | Neonatal preterm birth |
| 10 |  | Neonatal encephalopathy due to birth asphyxia and trauma |
| 11 |  | Neonatal sepsis and other neonatal infections |
| 12 |  | Hemolytic disease and other neonatal jaundice |
| 13 | Neoplasm | Brain and central nervous system cancer |
| 14 |  | Neuroblastoma and other peripheral nervous cell tumors |
| 15 | Stroke | Ischemic stroke |
| 16 |  | Intracerebral hemorrhage |
| 17 |  | Subarachnoid hemorrhage |
| 18 | Neurological disorders | Parkinson's disease |
| 19 |  | Idiopathic epilepsy |
| 20 |  | Multiple sclerosis |
| 21 |  | Motor neuron disease |
| 22 |  | Migraine |
| 23 |  | Tension-type headache |
| 24 |  | Other neurological disorders |
| 25 | Mental disorders | Anorexia nervosa |
| 26 |  | Bulimia nervosa |
| 27 |  | Autism spectrum disorders |
| 28 |  | Attention-deficit/hyperactivity disorder |
| 29 |  | Idiopathic developmental intellectual disability |
| 30 | Substance use disorders | Alcohol use disorders |
| 31 | Congenital birth defects | Neural tube defects |
| 32 |  | Down syndrome |
| 33 |  | Klinefelter syndrome |
| 34 |  | Other chromosomal abnormalities |
